# Supplementary material for: Evaluation of exogenous therapeutic protein activity under confinement and crowding effects
Source: Royal Society of Chemistry journal article supplement (doi:10.1039/d3nr02968a), 2023-01-01
Supplement: d3nr02968a1.pdf [file d3nr02968a1.pdf]

## Supporting information

### **Evaluation of exogenous therapeutic protein activity under confinement and crowding effects**

Jie Dai<sup>a</sup>, Zhiyi Peng<sup>a</sup>, Shuwei Shen<sup>a</sup>, Binbin Huang<sup>a</sup>, Lili Ren<sup>a</sup>, Jia Liu<sup>\*a</sup>, Chia-Hung Chen<sup>\*b</sup>, and Guoguang Chen<sup>\*a</sup>

<sup>a</sup> *School of Pharmaceutical Sciences, Nanjing Tech University, 30th Puzhu South Road, Nanjing 211816, China*

<sup>b</sup> *Department of Biomedical Engineering, City University of Hong Kong, 83 Tat Chee Avenue, Kowloon Tong, Hong Kong SAR, China*

\*E-mail: [jjaliu@njtech.edu.cn](mailto:jjaliu@njtech.edu.cn); [chiachen@cityu.edu.hk](mailto:chiachen@cityu.edu.hk); [ggchen@njtech.edu](mailto:ggchen@njtech.edu)

## SUPPLEMENTARY FIGURES

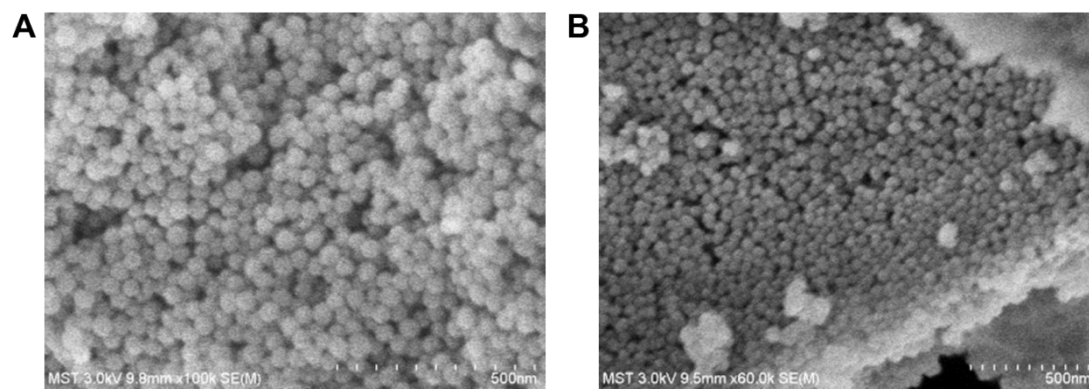

**Fig. S1** SEM images of (A) BS-NPs and (B) HRP@BS-NPs in a broader version.

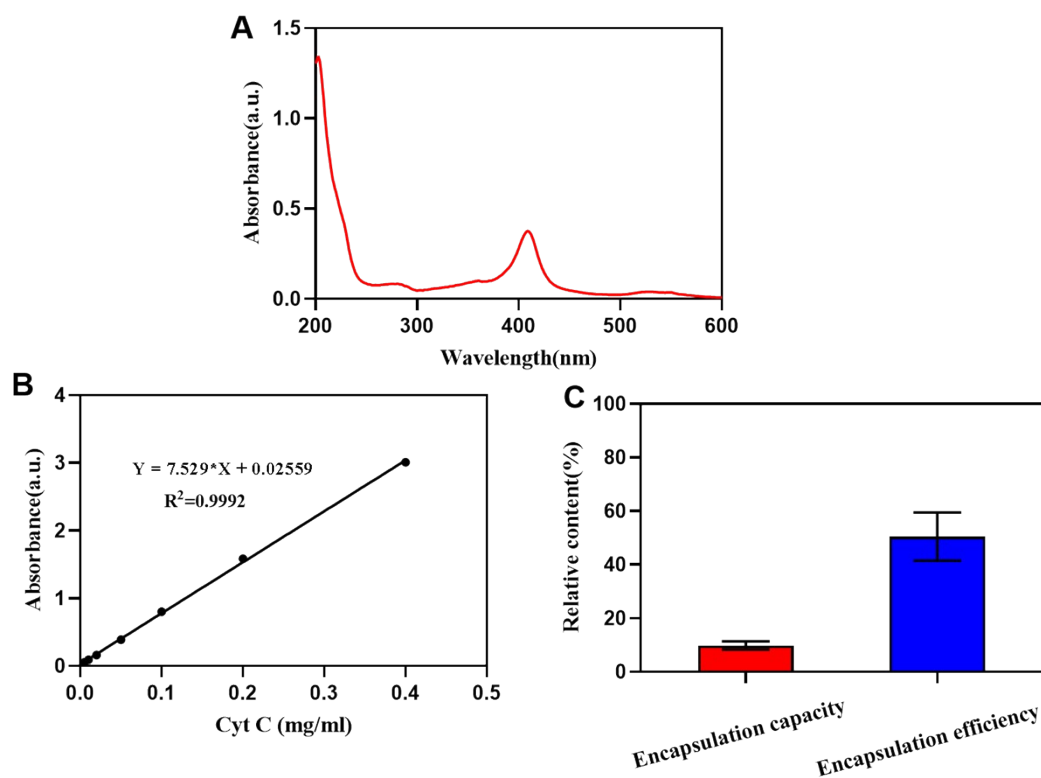

**Fig. S2** Quantification of Cyt C protein in the confined Cyt C@BS-NPs. (A) UV-vis spectra of the Cyt C standard solution. (B) Linear plot of UV-vis absorbance value at 409 nm *versus* the different concentrations of Cyt C standard solutions. (C) The corresponding encapsulation capacity and encapsulation efficiency of Cyt C into Cyt C@BS-NPs.

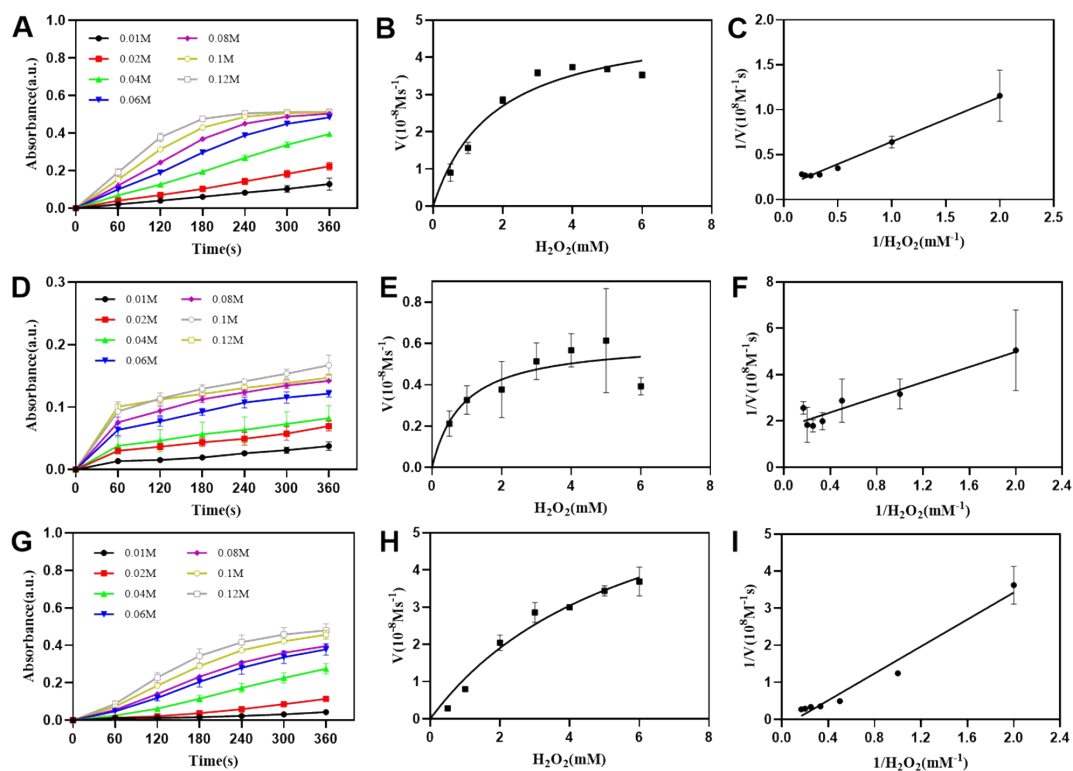

**Fig. S3** Cyt C protein activity characterization under different conditions. (A, D, G) Time-dependent absorbance changes caused by the oxidation product of oxTMB produced from TMB colorimetric assay under different environments: A) free solution, D) confined Cyt C@BS-NPs, and G) PEG<sub>4000</sub>-induced crowding. (B, E, H) Steady-state kinetic assay under different environments: B) free solution, E) confined Cyt C@BS-NPs, H) PEG<sub>4000</sub>-induced crowding, and (C, F, I) are their corresponding double-reciprocal plots, respectively.

**Table S1.** Detailed kinetic data of Cyt C under different environments.

| <b>Catalyst</b>                 | <b>Substrate</b>              | <b><math>K_m</math> / mM</b> | <b><math>V_{max}</math> / <math>10^{-8}</math> M·s<sup>-1</sup></b> | <b><math>K_{cat}</math> / s<sup>-1</sup></b> |
|---------------------------------|-------------------------------|------------------------------|---------------------------------------------------------------------|----------------------------------------------|
| Free Cyt C                      | H <sub>2</sub> O <sub>2</sub> | 1.76±0.06                    | 5.06±0.09                                                           | 0.66±0.01                                    |
| Cyt C@BS-NPs                    | H <sub>2</sub> O <sub>2</sub> | 0.89±0.04                    | 0.61±0.05                                                           | 0.08±0.01                                    |
| Cyt C + 30% PEG <sub>4000</sub> | H <sub>2</sub> O <sub>2</sub> | 6.31±2.36                    | 7.79±1.82                                                           | 1.01±0.24                                    |

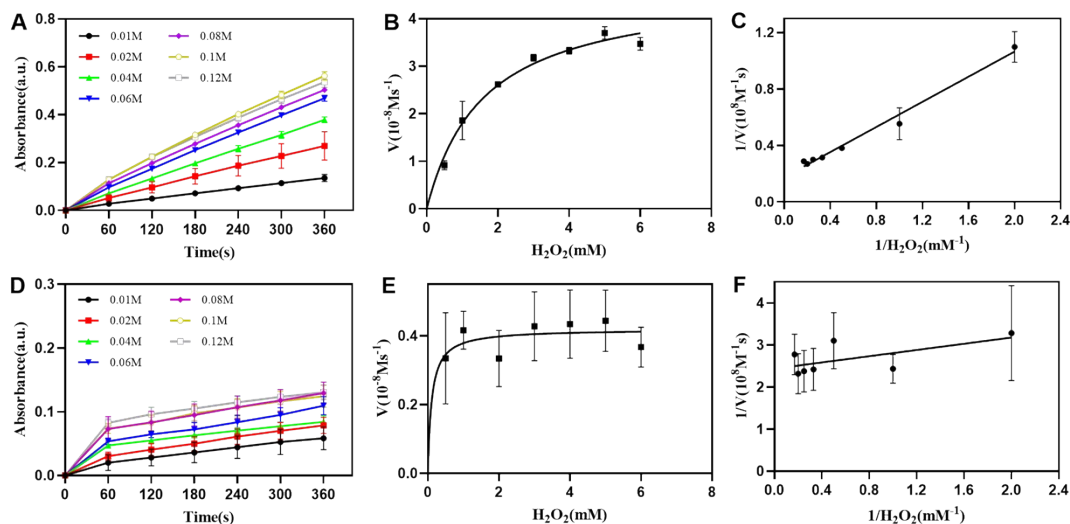

**Fig. S4** Thermal stability of HRP protein. (A, D) Time-dependent absorbance changes caused by the oxTMB produced from TMB colorimetric assay with a series of concentrations of H<sub>2</sub>O<sub>2</sub> in the free solution and in the confined HRP@BS-NPs. (B, E) Steady-state kinetic assay for HRP-catalyzed TMB-H<sub>2</sub>O<sub>2</sub> reactions performed under different conditions: B) free solution, E) confined HRP@BS-NPs, and (C, F) are their corresponding double-reciprocal plots, respectively.

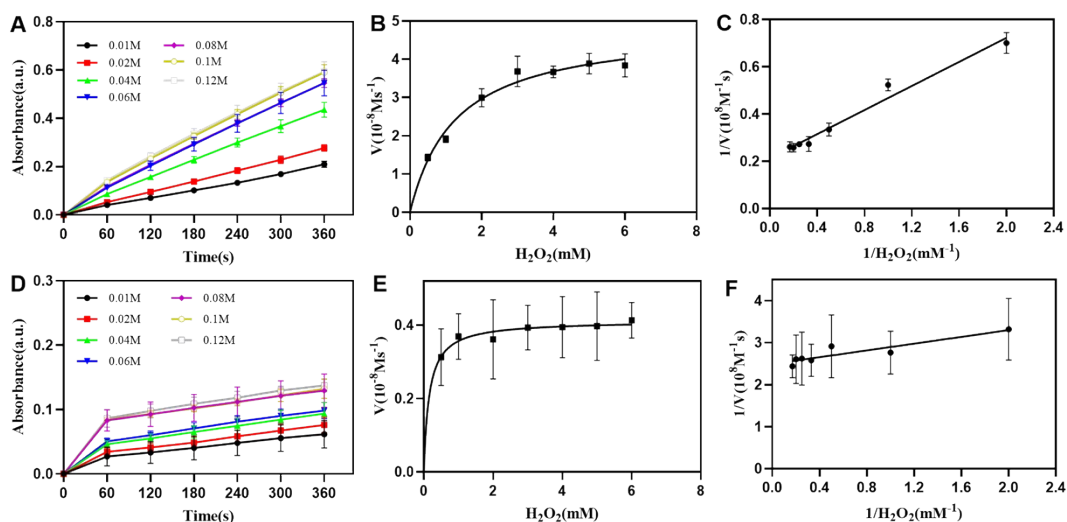

**Fig. S5** Storage stability investigation of HRP protein under different conditions after a week. (A, D) Time-dependent absorbance changes caused by the oxTMB produced from TMB colorimetric assay with a series of concentrations of  $H_2O_2$  in the free solution and in the confined HRP@BS-NPs. (B, E) Steady-state kinetic assay for HRP-catalyzed TMB- $H_2O_2$  reactions performed under different conditions: B) free solution, E) confined HRP@BS-NPs, and (C, F) are their corresponding double-reciprocal plots, respectively.

**Table S2.** Thermal stability and storage stability of HRP in the free solution.

| Free HRP          | Substrate                     | $K_m$ / mM | $V_{max}$ / $10^{-8} \text{ M}\cdot\text{s}^{-1}$ | $K_{cat}$ / $10^3 \text{ s}^{-1}$ | Relative activity (%) |
|-------------------|-------------------------------|------------|---------------------------------------------------|-----------------------------------|-----------------------|
| HRP activity      | H <sub>2</sub> O <sub>2</sub> | 2.39±0.03  | 10.10±0.21                                        | 7.11±0.15                         | 100±2.11              |
| Thermal stability | H <sub>2</sub> O <sub>2</sub> | 1.65±0.36  | 4.73±0.36                                         | 3.33±0.25                         | 46.84±3.52            |
| Storage stability | H <sub>2</sub> O <sub>2</sub> | 1.28±0.23  | 4.87±0.43                                         | 3.43±0.30                         | 48.24±2.00            |



**Table S3.** Thermal stability and storage stability of HRP in the confined HRP@BS-NPs.

| <b>HRP@BS-NPs</b> | <b>Substrate</b>              | <b><math>K_m</math> / mM</b> | <b><math>V_{max}</math> / <math>10^{-8} \text{ M}\cdot\text{s}^{-1}</math></b> | <b><math>K_{cat}</math> / <math>10^3 \text{ s}^{-1}</math></b> | <b>Relative activity (%)</b> |
|-------------------|-------------------------------|------------------------------|--------------------------------------------------------------------------------|----------------------------------------------------------------|------------------------------|
| HRP activity      | H <sub>2</sub> O <sub>2</sub> | 0.25±0.07                    | 0.50±0.01                                                                      | 0.35±0.01                                                      | 100±2.86                     |
| Thermal stability | H <sub>2</sub> O <sub>2</sub> | 0.30±0.02                    | 0.45±0.06                                                                      | 0.32±0.04                                                      | 91.43±11.43                  |
| Storage stability | H <sub>2</sub> O <sub>2</sub> | 0.23±0.02                    | 0.42±0.04                                                                      | 0.29±0.03                                                      | 82.86±8.57                   |

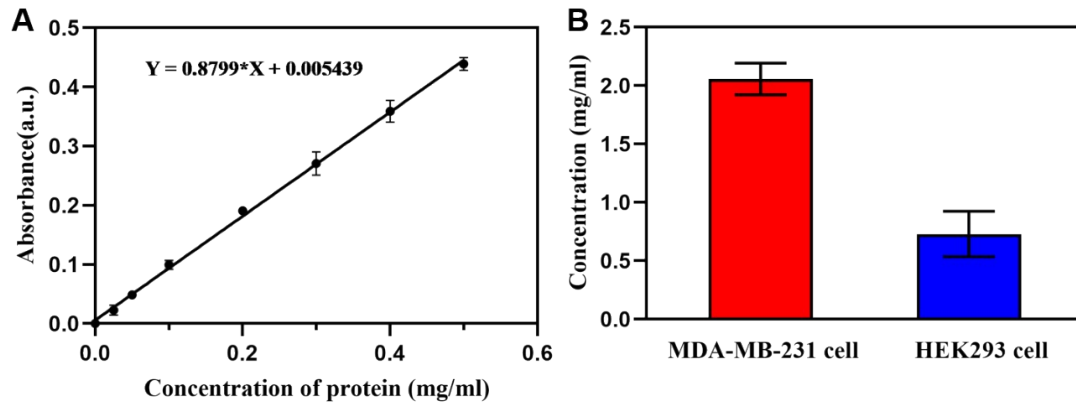

**Fig. S6** Determination of the total protein content in cell extracts of different cell lines by BCA assay. (A) Linear plot of microplate reader absorbance value at 562 nm *versus* the different concentrations of BSA standard solutions. (B) Determination of the total protein content in MDA-MB-231 cancer cell extracts and HEK293 normal cell extracts by BCA assay.
